# Supplementary material for: Variability in the response of the cyanobacterium Nodularia spumigena to nitrogen supplementation
Source: Royal Society of Chemistry journal article supplement (doi:10.1039/c002863k), 2010-01-01
Supplement: c002863k.pdf [file c002863k.pdf]

Figure S1.

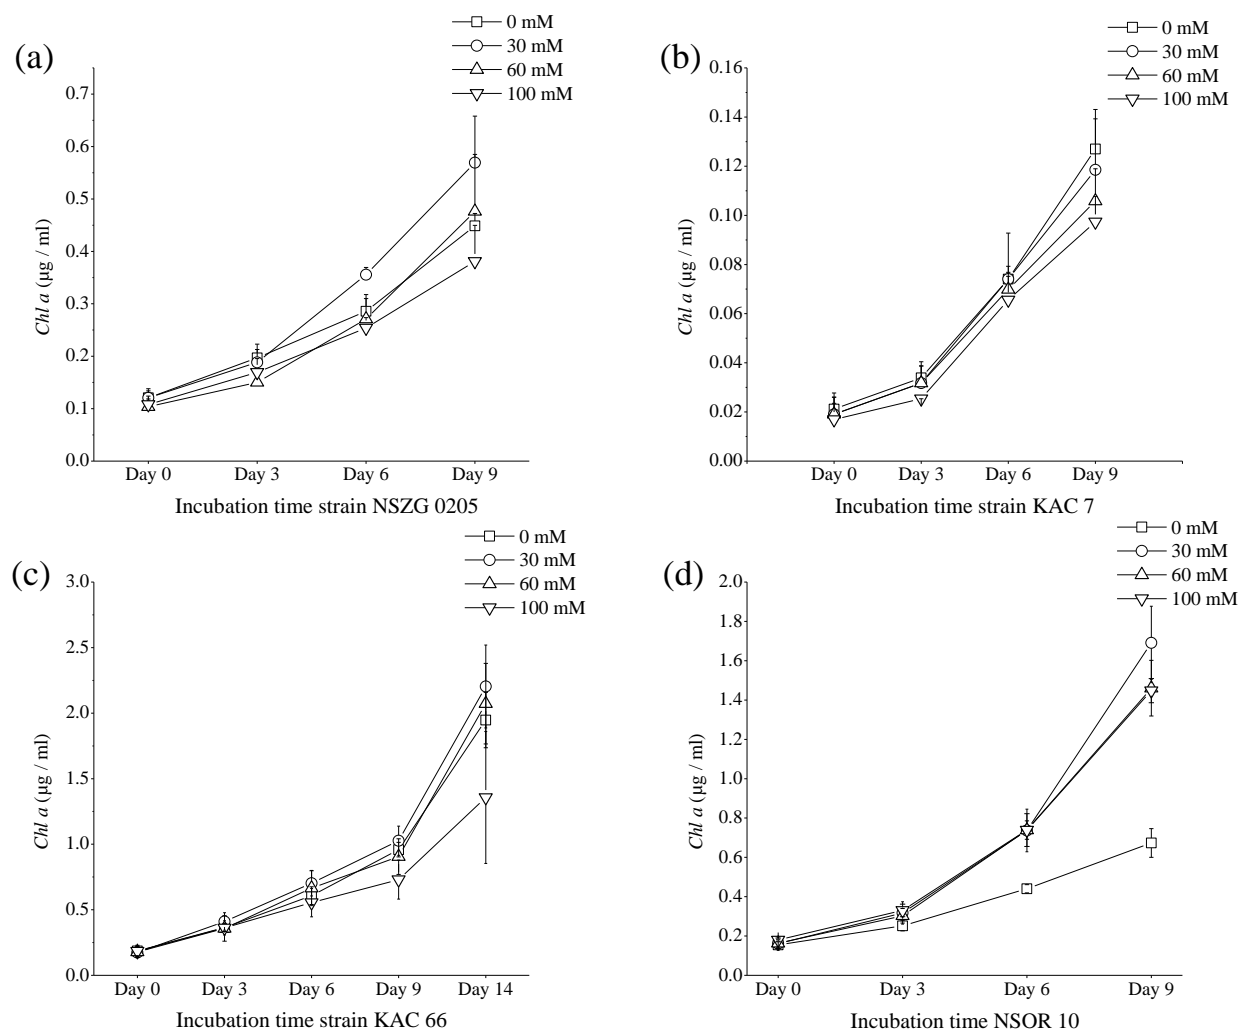

Effect of nitrate supplementation on growth of *N. spumigena* strain NSZG0205 (a), KAC7 (b), KAC66 (c) and NSOR10 (d). Error bars denote standard deviation.

Figure S2.

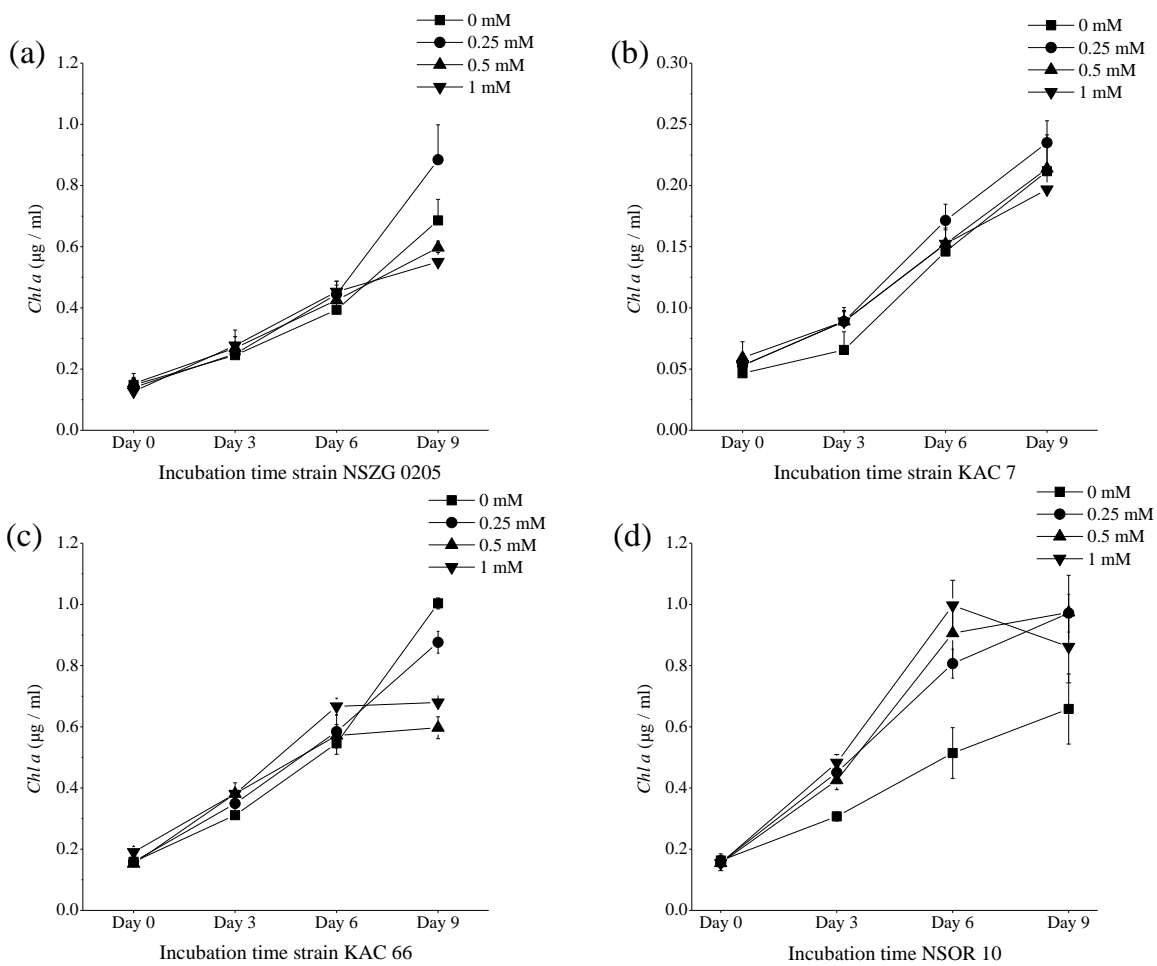

Effect of ammonium supplementation on growth of *N. spumigena* strain NSZG0205 (a), KAC7 (b), KAC66 (c) and NSOR10 (d). Error bars denote standard deviation.

**Table S1.**

| <i>Nodularia spumigena</i> strains | NH <sub>4</sub> <sup>+</sup> |             | NO <sub>3</sub> <sup>-</sup> |             |
|------------------------------------|------------------------------|-------------|------------------------------|-------------|
|                                    | 0 mM                         | 1 mM        | 0 mM                         | 30 mM       |
| <b>KAC11</b>                       | 0.92 ± 0.19                  | 0.57 ± 0.03 | 1.59 ± 0.24                  | 1.79 ± 0.31 |
| <b>KAC71</b>                       | 0.30 ± 0.03                  | 0.51 ± 0.17 | 3.66 ± 0.65                  | 4.75 ± 0.89 |
| <b>NSBL-5</b>                      | 1.63 ± 0.63                  | 1.21 ± 0.13 | 2.60 ± 0.30                  | 3.63 ± 0.46 |
| <b>PCC 73104</b>                   | 2.25 ± 0.29                  | 1.10 ± 0.09 | 5.11 ± 0.81                  | 8.53 ± 0.97 |

The effect of nitrate and ammonium on growth of *N. spumigena* strains after 9 days of incubation as compared to nitrogen fixing cultures.
